# Supplementary material for: Burnout in der Kita und der Zusammenhang zu Aspekten der Arbeitszufriedenheit
Source: Atypon-hosted journal article supplement (doi:10.1026/2191-9186/a000566), 2022-04-01
Supplement: 2191-9186_a000566_esm1.pdf [file 2191-9186_a000566_esm1.pdf]

# BURNOUT UND ARBEITSZUFRIEDENHEIT

## Elektronisches Supplement ESM 1

**Tabelle A1.**

Deskriptive Werte und Korrelationen zwischen Burnout-Dimensionen, Aspekten der Arbeitszufriedenheit und Kontrollvariablen.

|                                                     | <i>M(SD)</i>  | (1)    | (2)    | (3)    | (4)   | (5)   | (6)   | (7)   | (8)   | (9)   | (10)  | (11) | (12)  | (13) | (14)  | (15) |
|-----------------------------------------------------|---------------|--------|--------|--------|-------|-------|-------|-------|-------|-------|-------|------|-------|------|-------|------|
| <i>Burnout-Dimensionen<sup>a</sup></i>              |               |        |        |        |       |       |       |       |       |       |       |      |       |      |       |      |
| (1) Emotionale Erschöpfung                          | 2.65 (1.17)   | 1      |        |        |       |       |       |       |       |       |       |      |       |      |       |      |
| (2) Depersonalisation                               | 1.38 (.97)    | .50**  | 1      |        |       |       |       |       |       |       |       |      |       |      |       |      |
| (3) Verringerte Leistungsfähigkeit                  | 1.99 (.75)    | .53**  | .41**  | 1      |       |       |       |       |       |       |       |      |       |      |       |      |
| <i>Aspekte der Arbeitszufriedenheit<sup>a</sup></i> |               |        |        |        |       |       |       |       |       |       |       |      |       |      |       |      |
| <i>Soziale Facette</i>                              |               |        |        |        |       |       |       |       |       |       |       |      |       |      |       |      |
| (4) Zusammenarbeit im Team                          | 3.96 (1.35)   | -.36** | -.36** | -.38** | 1     |       |       |       |       |       |       |      |       |      |       |      |
| (5) Zusammenarbeit mit den Eltern                   | 4.05 (1.18)   | -.32** | -.26** | -.33** | .34** | 1     |       |       |       |       |       |      |       |      |       |      |
| <i>Kognitiv-intellektuelle Facette</i>              |               |        |        |        |       |       |       |       |       |       |       |      |       |      |       |      |
| (6) Aufstiegschancen                                | 3.71 (1.89)   | -.39** | -.24** | -.21** | .27*  | .13*  | 1     |       |       |       |       |      |       |      |       |      |
| (7) Fortbildungsmöglichkeiten                       | 4.48 (1.55)   | -.26** | -.22** | -.21** | .25** | .18** | .59** | 1     |       |       |       |      |       |      |       |      |
| <i>Instrumentell-materielle Facette</i>             |               |        |        |        |       |       |       |       |       |       |       |      |       |      |       |      |
| (8) Ausstattung der Einrichtung                     | 3.73 (1.43)   | -.21** | -.10   | -.08   | .27** | .26** | .28** | .31** | 1     |       |       |      |       |      |       |      |
| (9) Pädagogische Arbeit d. Einrichtung              | 4.06 (1.20)   | -.32** | -.28** | -.29** | .60** | .31** | .31** | .31** | .43** | 1     |       |      |       |      |       |      |
| (10) Arbeitszeiten                                  | 4.27 (1.50)   | -.35** | -.21** | -.25** | .34** | .32** | .35** | .31** | .20** | .31** | 1     |      |       |      |       |      |
| (11) Arbeitslohn                                    | 2.99 (1.66)   | -.32** | -.13*  | -.04   | .06   | .09   | .52** | .42** | .35** | .16** | .23** | 1    |       |      |       |      |
| <i>Kontrollvariablen</i>                            |               |        |        |        |       |       |       |       |       |       |       |      |       |      |       |      |
| (12) Alter                                          | 43.13 (11.07) | -.11   | -.22** | -.09   | .05   | .01   | .02   | .06   | -.09  | .01   | -.04  | -.11 | 1     |      |       |      |
| (13) Geschlecht <sup>b</sup>                        | .10 (.30)     | -.001  | .12*   | .04    | .03   | -.03  | -.03  | -.02  | .01   | -.01  | .03   | -.02 | -.08  | 1    |       |      |
| (14) Leitungsfunktion <sup>c</sup>                  | .42 (.50)     | -.08   | -.07   | -.11*  | .12*  | .01   | .12*  | .10   | -.08  | .05   | .01   | -.01 | .25** | .00  | 1     |      |
| (15) Arbeitswochenstunden                           | 35.30 (5.85)  | -.06   | .08    | -.21** | .04   | -.04  | .06   | .05   | -.12* | -.06  | -.07  | -.07 | .17** | .10  | .35** | 1    |

Anmerkung: *N* = 306-346; <sup>a</sup>Range: 0–6; <sup>b</sup>0 = weiblich, 1 = männlich; <sup>c</sup>0 = nein, 1 = ja.

\*  $p < .05$ , \*\*  $p < .01$
